# Supplementary material for: Correlation between PD-L1 Expression of Non-Small Cell Lung Cancer and Data from IVIM-DWI Acquired during Magnetic Resonance of the Thorax: Preliminary Results
Source: MDPI journal article supplement (doi:10.3390/cancers14225634), 2022-11-16
Supplement: s1 [file s1]

## Supplementary Materials

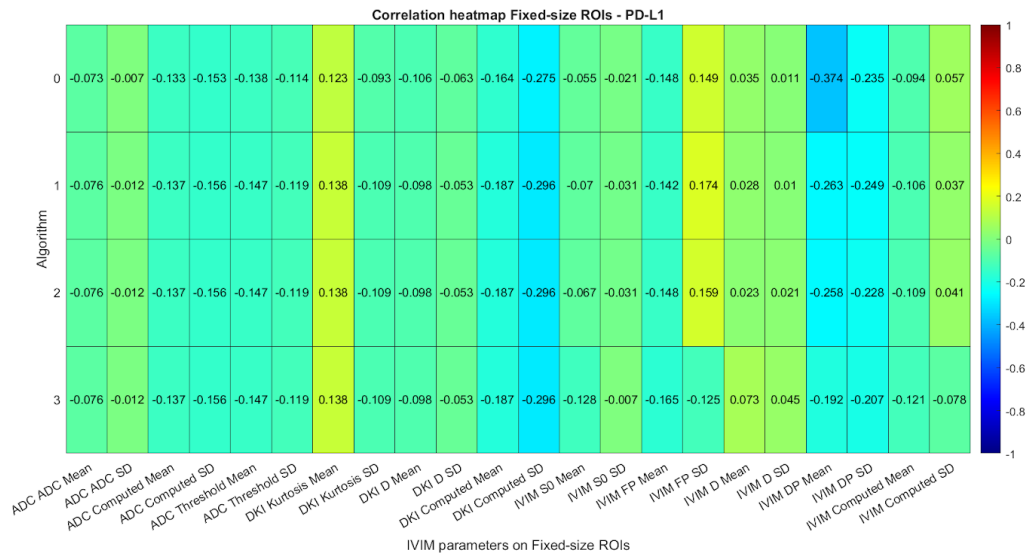

**Figure S1.** Correlation heatmap for fixed-size ROIs between the 22 IVIM-DWI parameters and the expression of PD-L1. Each row represents a different algorithm. Analysis on 19 patients.

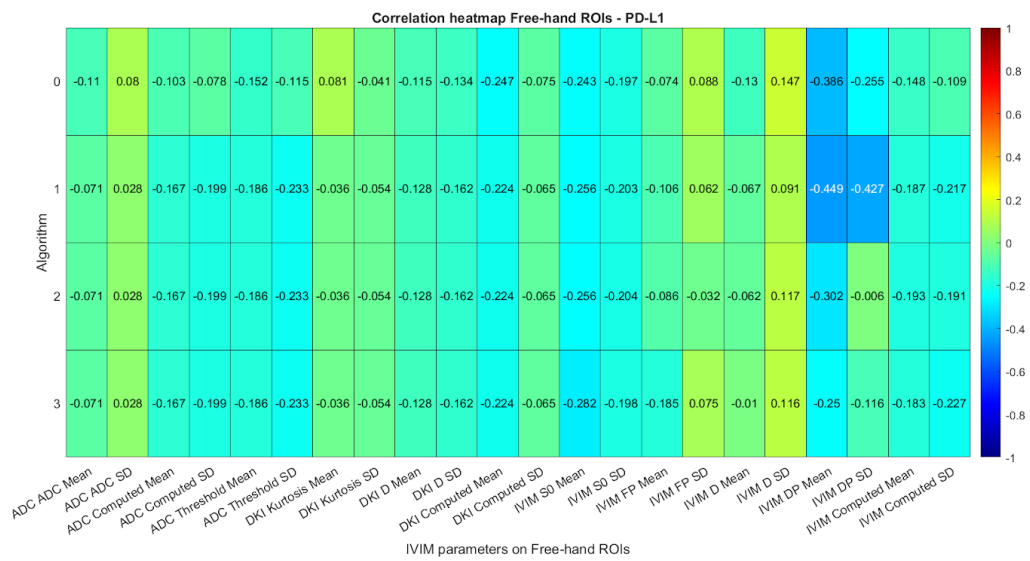

**Figure S2.** Correlation heatmap for freehand ROIs between the 22 IVIM-DWI parameters and the expression of PD-L1. Each row represents a different algorithm. Analysis on 21 patients.

**Table S1.** Table with results for fixed-size ROIs for algorithms 0, 1, 2 and 3. G0 refers to non-expression PD-L1 and G1 to positive expression of PD-L1.

| Results for fixed-size ROIs |                                      |        |        |         |       |              |
|-----------------------------|--------------------------------------|--------|--------|---------|-------|--------------|
| Units                       |                                      | Mean   |        | St.Dev. |       | P-val WMW    |
|                             |                                      | G0     | G1     | G0      | G1    |              |
| Algorithm 0                 |                                      |        |        |         |       |              |
| ADC                         | $\mu\text{m}^2/\text{s} \times 10^6$ | 1445.8 | 1519.8 | 359.6   | 310.7 | 0.842        |
| D                           | $\mu\text{m}^2/\text{s} \times 10^6$ | 1173.3 | 1327.0 | 289.5   | 373.0 | 0.356        |
| D*                          | $\mu\text{m}^2/\text{s} \times 10^4$ | 189.2  | 122.0  | 65.7    | 31.3  | <b>0.008</b> |
| pf                          | $\mu\text{m}^2/\text{s} \times 10^3$ | 274.3  | 209.7  | 184.9   | 82.1  | 0.549        |
| Algorithm 1                 |                                      |        |        |         |       |              |
| ADC                         | $\mu\text{m}^2/\text{s} \times 10^6$ | 1447.9 | 1519.8 | 357.4   | 310.7 | 0.842        |
| D                           | $\mu\text{m}^2/\text{s} \times 10^6$ | 1180.3 | 1331.8 | 286.9   | 370.0 | 0.352        |
| D*                          | $\mu\text{m}^2/\text{s} \times 10^4$ | 317.8  | 199.0  | 133.0   | 83.2  | 0.065        |
| pf                          | $\mu\text{m}^2/\text{s} \times 10^3$ | 276.6  | 216.9  | 185.9   | 86.2  | 0.497        |
| Algorithm 2                 |                                      |        |        |         |       |              |
| ADC                         | $\mu\text{m}^2/\text{s} \times 10^6$ | 1447.9 | 1519.8 | 357.4   | 310.7 | 0.842        |
| D                           | $\mu\text{m}^2/\text{s} \times 10^6$ | 1189.2 | 1325.3 | 297.1   | 377.1 | 0.400        |
| D*                          | $\mu\text{m}^2/\text{s} \times 10^4$ | 76.9   | 45.1   | 70.9    | 16.7  | 0.549        |
| pf                          | $\mu\text{m}^2/\text{s} \times 10^3$ | 269.8  | 203.5  | 188.9   | 83.9  | 0.447        |
| Algorithm 3                 |                                      |        |        |         |       |              |
| ADC                         | $\mu\text{m}^2/\text{s} \times 10^6$ | 1447.9 | 1519.8 | 357.4   | 310.7 | 0.842        |
| D                           | $\mu\text{m}^2/\text{s} \times 10^6$ | 1265.5 | 1499.4 | 434.9   | 378.0 | 0.156        |
| D*                          | $\mu\text{m}^2/\text{s} \times 10^4$ | 295.6  | 213.0  | 149.0   | 118.1 | 0.243        |
| pf                          | $\mu\text{m}^2/\text{s} \times 10^3$ | 325.6  | 241.9  | 187.8   | 61.9  | 0.661        |

**Table S2.** Table with results for free-hand ROIs for algorithms 0, 1, 2 and 3. G0 refers to non-expression PD-L1 and G1 to positive expression of PD-L1.

| Results for free-hand ROIs |                                      |        |        |         |       |           |
|----------------------------|--------------------------------------|--------|--------|---------|-------|-----------|
| Units                      |                                      | Mean   |        | St.Dev. |       | P-val WMW |
|                            |                                      | G0     | G1     | G0      | G1    |           |
| Algorithm 0                |                                      |        |        |         |       |           |
| ADC                        | $\mu\text{m}^2/\text{s} \times 10^6$ | 1495.5 | 1630.8 | 334.8   | 395.1 | 0.594     |
| D                          | $\mu\text{m}^2/\text{s} \times 10^6$ | 1245.5 | 1360.6 | 348.8   | 368.5 | 0.804     |
| D*                         | $\mu\text{m}^2/\text{s} \times 10^4$ | 174.8  | 139.6  | 79.1    | 33.1  | 0.145     |
| pf                         | $\mu\text{m}^2/\text{s} \times 10^3$ | 266.8  | 264.1  | 183.1   | 136.6 | 0.804     |
| Algorithm 1                |                                      |        |        |         |       |           |
| ADC                        | $\mu\text{m}^2/\text{s} \times 10^6$ | 1458.4 | 1630.8 | 354.0   | 395.1 | 0.337     |
| D                          | $\mu\text{m}^2/\text{s} \times 10^6$ | 1191.1 | 1365.0 | 356.9   | 366.4 | 0.456     |
| D*                         | $\mu\text{m}^2/\text{s} \times 10^4$ | 286.1  | 210.8  | 108.5   | 60.6  | 0.127     |
| pf                         | $\mu\text{m}^2/\text{s} \times 10^3$ | 287.6  | 270.2  | 172.3   | 136.6 | 0.915     |
| Algorithm 2                |                                      |        |        |         |       |           |
| ADC                        | $\mu\text{m}^2/\text{s} \times 10^6$ | 1458.4 | 1630.8 | 354.0   | 395.1 | 0.337     |
| D                          | $\mu\text{m}^2/\text{s} \times 10^6$ | 1201.1 | 1359.5 | 358.8   | 361.8 | 0.499     |
| D*                         | $\mu\text{m}^2/\text{s} \times 10^4$ | 100.6  | 64.6   | 102.0   | 35.2  | 0.972     |
| pf                         | $\mu\text{m}^2/\text{s} \times 10^3$ | 279.8  | 262.3  | 175.1   | 145.7 | 1.000     |
| Algorithm 3                |                                      |        |        |         |       |           |
| ADC                        | $\mu\text{m}^2/\text{s} \times 10^6$ | 1458.4 | 1630.8 | 353.9   | 395.1 | 0.337     |
| D                          | $\mu\text{m}^2/\text{s} \times 10^6$ | 1310.7 | 1556.8 | 561.9   | 404.8 | 0.145     |
| D*                         | $\mu\text{m}^2/\text{s} \times 10^4$ | 263.6  | 228.9  | 144.3   | 61.3  | 1.000     |
| pf                         | $\mu\text{m}^2/\text{s} \times 10^3$ | 368.2  | 304.1  | 189.1   | 115.9 | 0.594     |
